# Supplementary material for: The identification of alternative oxidase in intermediate host snails of Schistosoma and its potential role in protecting Oncomelania hupensis against niclosamide-induced stress
Source: PubMed Central journal article supplement (PMC8935807; doi:10.1186/s13071-022-05227-5), 2022-03-21
Supplement: 13071_2022_5227_MOESM5_ESM.pdf [file 13071_2022_5227_MOESM5_ESM.pdf]

*T. brucei*

*T. brucei*  
*T. congolense*  
*T. vivax*  
*A. deanei*  
*C. andersoni*  
*C. tyzzeri*  
*B. alexandrina*  
*B. straminea*  
*B. glabrata*  
*A. californica*  
*P. calliculate*  
*O. hupensis*  
*P. maximus*  
*M. yessoensis*  
*C. gigas X2*  
*C. gigas X1*  
*C. virginica X2*  
*C. virginica X1*  
*B. floridiae*  
*A. planci*  
*P. miniata*  
*A. rubens*  
*A. japonica X1*  
*S. pistillata*  
*O. faveolata*  
*A. tenebrosa*  
*E. diaphana*  
*N. vectensis*  
*A. millepora*  
*P. damicornis*  
*D. gigantea*  
*L. anatina*  
*P. dicentrarchi*  
*A. udagawae*  
*P. citri*  
*H. capsulatum*  
*E. crescens*  
*P. hystricis*  
*T. interdigitale H6*  
*E. mesophile*  
*A. bisporus*  
*P. conissans*  
*C. cinerea*  
*G. lividus*  
*P. ammoniavirescens*  
*S. rosetta*  
*C. cylindracea*  
*H. sp. ATCC 50920*  
*O. tauri*  
*I. sp. A28L*  
*A. shirensis*  
*M. indica*  
*C. papaya*  
*C. olitorius*  
*G. max*  
*V. unguiculata*  
*M. sativa*  
*D. carota*  
*S. lycopersicum*  
*A. thaliana*  
*A. tauschii* subsp. *strangulata*  
*T. aestivum*  
*H. vulgare* subsp. *spontaneum*  
*P. hallii*  
*S. officinarum*  
*P. dactylifera*  
*E. guineensis*  
*P. equestris*  
*M. alkaliphilum*

1 10  
.....MFRNHASRITAAAAAPVW  
.....MLRINASCINAAAAATTT  
.....MLRYRTPTLAAAAAMKV  
.....MFPLRRQVTARLTGTQRFGATT  
.....MNFQSNISRNIISNFNQLFFNCNYIKAT  
.....MYVVRNLLNTKLRIFYGRHLWLLSSKVNLI  
.....MNVVSIIRGLTKFGSSNSLVASLLPSTSTFT  
.....MNVVSIIRGLTKFGSSNSLVASLLPSTSTFT  
.....MNRVSIIRGFTKFGSSNSIASLLPSTFN..T  
.....MMLSPLPSTMRAFAAHGSNFSMATAFVSTTTGRSFSSSVSGTVRSSSKTLP  
.....MSSSTIFLRSSARTLCASRIVI SAAELNLSAP  
.....MSLCFSALTIRPSACAVGALRSSFGASALKLSAHL  
.....MLTSRMLVRCGAENALKNITAIAPP  
.....MLTSRMLVRCGAENALKNVTIIAPS  
.....MGSRLQITKLSENGVR  
.....MGSRLQITKLSENGVR  
.....MGSRLQITRLENGVR  
.....MGSRLQITRLENGVR  
.....MATRGALRLRTAAVGGMLSRSSFHLSAAPLNSCLLTPRERQ  
MLTVTAKQASLCANN.LIHVWPRFSFVAVRALND.SITGRPLGLRDPSPCQAAGACRPYSLITGGLSRPCTAKLTSTRTA  
MLKVTVKQASLLSANNLVVWPRCFGLAVHSSSD.SFPSAPR.RPKVSPRLAAVPCRPFSLIAGGSSGCTAGFALTRAV  
MLPLTSSKSLPSSITRVIHVAVNLSCESGRLATRKFLCVISTGSHHTPSVVVSHGRASPLNHGYSYCDPDKTITAGFGCS  
.....MVASSMLYKGSFCARMSTMIGLSPA  
.....MATIGLQRPFSVIRGIANCSTFVKP  
.....MATIGLRRISVIRGIINCSFVKH  
.....MIVPKLGRFHSFGSAGSRVLAII  
.....MTTIRIGRVYGSGRLLNAYVALAQ  
.....MSVREFHRAIPLSRILNRSTRSCT  
.....MALLKSHRLLSPVVNVVRSAGSTR.  
.....MLPTKTRQFFSPTILFALKSSLNR  
.....MKSVSRSLSFFRQHFGRKASSRFITATGKRWDLP  
.....MAARGFRQLAGTCRTGCLHCLRLLV  
.....MQSFARKFCTSSALVHSSNNALF  
.....MNSITATMPLRATALPKT  
.....MYPTSAGCARVLMACAPAML  
.....MYPTSAGSTRILMACAPSML  
.....MSGTTPSICIYKSLRGA  
.....MHAPTAPFPALVQSGGARLL  
.....MNPSTRATLLPSL  
.....MRYVGTVSTLSYLPRR  
.....MLKSTLLRTTAVQLRTPPTLLSTARLLA  
.....MTTLLRSALAHSPARHSLIFRSLLIDHGAYRSTPELRLV  
.....MSVLLRSTLIHSATRHHPLIFRSALIGCGAYRRTPELRLVA  
.....MTVLLRASRSLLLQVLLRRP  
.....MLSTSRRFASFYGRFVAVSEQLTHG  
.....MLRASLTSVSGLLARNAASVSIIRNEFVTASTTALR  
.....MMRRVAQTLARSHLHASTTSQTTTARALWSSGMTRTFNENSIATTHR  
.....MNRFFVARSVIRALMVNSRSCGGSNRMLYAATTATVR  
.....MNRFFVRSVMQGLINGRSSIINGQVCRAAVVGRGVQ  
.....MKLTALNSTVRRALLNQRNGNRLGSAALMPYAA  
.....MKFIALSCTVRRALLNQRNCG..LGSTAVMAYAA  
.....MKHSALCYMARRALIGRNSNRQSSAVVRSFAAAE  
.....MNQMVARSVIRRLINSQKSPISTFRSHDDIA  
.....MNQLLVRLLVMRRLVSGGTRNGCISSSSAAMFREVHKPS  
.....MSQLITKAALRVLLVCGRGNCFVSSVSTSVMKSPYEITA  
.....MSSRMAGSVLLRRAGAGASRLFATTPSPA  
.....MSSRMAGSVLLRRAGAGASRLFATTPSPA  
.....MSSRMAGSAILRRAGVAGSRLFATTPSPA  
.....MSSRAAGSVLLHLLGPRVFGPVSSPAAAAA  
.....MMSRMRGASALIRQLGPRLF.SAG...ATRAA  
.....MMSRMTGSALLRQLGPRLFSVSSAAPTRAA  
.....MMSQVRRSVTLVRQLGLRSFSTSPSADRVGA

T. brucei

20

T. brucei LRTACRQKSDA . . . . . K  
T. congolense LWSAMRLRSDG . . . . . K  
T. vivax QQMFTHSSSSSN . . . . . K  
A. deanei LRCCAATQESAI . . . . . P  
C. andersoni NKCLTTSRYVSTIDTRVGGTQSVYSPLHQP . . . . . SQPHPD  
C. tyzzeri NLCSIVHSNKGQKITSKLYITLEKDRSNN . . . . . NOGDFS  
B. alexandrina YKNGKLLCQRTALRSSVIGSYQFLVMQN . . . . . RGIADDKQ . . . .  
B. straminea YKNGKLLCQRTALRSSVIGSYQFLVMQN . . . . . RGIADDKQ . . . .  
B. glabrata HKNGKLLCQRTGFRTSFIEGYQFVVVQI . . . . . RGIADDKQ . . . .  
A. californica IRHASCVMCTTDQAKPAHKVTSFFVGLQQ . . . . . YRGLADKKEINEK  
P. canaliculate AVGR . . . . . LVCAPAPQVRHLTTQR . . . . . EIREN  
O. hupensis SSCARTVDVGAVGASIQFPQIRTLDGRIITERTFASKPKHTKCADCTCATCSNKVRLSTTETQLQQVEGNLKKQIQEN  
P. maximus VKVKQGFVNV . HLWLHRAVVRPDMCSVRN . . . . . YVATKEEVDH  
M. yessoensis QSVKVKQGCVGHHLAPARPTLCSATVRN . . . . . YAATKQEVDEH  
C. gigas X2 IFCSQLKNLENNISILLRVSGIRTSNGLR . . . . . NAGTKADVNDEN  
C. gigas X1 IFCSQLKNLENNISILLRVSGIRTSNGLR . . . . . NAGTKADVNDEN  
C. virginica X2 IFCKQMKDAENASILLRINGIRTSGLR . . . . . TAATKADDEN . . . .  
C. virginica X1 IFCKQMKDAENASILLRINGIRTSGLR . . . . . TAATKADDEN . . . .  
B. floridae ISLVQRMYLSSATQTSPKPVTEKKVEKVT . . . . . VVSTPAQKDEIQMKDAR  
A. planci GKNILAQPPFNLSSSSTLTKQRFVSTTSPQ . . . . . DET  
P. miniata GSNVVLPFNVINPPTHQIKIQLSTASQQ . . . . . DEKVRVDMP  
A. rubens STSSAGLKRLLALVGCIIHQAKLLSTSP . . . . . P  
A. japonica X1 KTSLWLKGGQLTKACRNHKQLLSTSCMAL . . . . . QG . . . . .  
S. pistillata ISAVDFFG . . KLGWSARPRRTGVS . . QF . . . . . STNTILKRSS  
O. faveolata INVTLAESDSEFKLRGILLPQRTAIS . LL . . . . . STNAIKR . . . .  
A. tenebrosa LARGP . . RLGAVNIRSCCQMGGYFPKIS . . . . . TPSAPYSVR  
E. diaphana QRACFGQTAHLANNIQIQRSHAGKSSGDF . . . . . VVSVPPVR  
N. vectensis RLVLRG . . LRSSSFASSLKQRTAFFTANR . . . . . LTPAYLTTN  
A. millepora . . . . . SGFLLGIRSQESL . . . . . RKPILCRLL  
P. damicornis ILPGFR . . . . . ALQDGGLLLETP . . . . . SNSCTVRL  
D. gigantea HSTCHINIWPGHRFSFHVVRQKHSSPA . . . . . ARNKFOKYS  
L. anatina MEMQRITPVVSTIHRQICYTQPRPAVSA . . . . . I  
P. dicentrarchi KQSIINYTPLY . . . . .  
A. udagawae YLRFITRTYASAVGASGCSRPLASSN . . . . . H  
P. citri MLSRQSATAQIRVITNSTLPLNASRAI . . . . . F  
H. capsulatum RGPLLRPSTTAIRGLRGS . . LLYHYA . . . . . T  
E. crescens RG . ALRPSTSAMRGLRSSP . . MIYHYT . . . . . A  
P. hystricis AGGMRLRQSTAVGTGLRGS . . VLLHQF . . . . . G  
T. interdigitale H6 SQKCLASGFRPSTLAIGLRGNSASLYN . . . . . Q  
E. mesophile TTNISRVASKGLYCSAATTGLRASYS . . . . . L  
A. bisporus IGFMFAGRRTLLTSSDKETLNSSAVEK . . . . . H  
P. conissans . . . . .  
C. cinerea RPLVCRGLHSTGYLRSALSASAKTRET . . . . . H  
G. lividus VTKRSNIHTGRVDQNFLLTKKGPNEKAA . . . . . T  
P. ammoniavirescens VIQGSNIHTGRIDQNSLIKKRLNEEAD . . . . . T  
S. rosetta CVRVVTASNALAASTQVRGVHTSKDNE . . . . . Q  
C. cylindracea PLQNTYFSTQQQLRKTLDLEWDEDKH . . . . . D  
H. sp. ATCC 50920 GRLEFTTSPSTWSDLPPMAEPPAPHAGL . . . . . R  
O. tauri DEVAMDGSARRARAHSRAPGAPLASGR . . . . . S  
I. sp. A28L . . . . .  
A. shirensis . . . . .  
M. indica . . . . . MLSNAGGAEAQVK . . . . . EQK . . . . .  
C. papaya PWEISDVGRGDFGAFNWRMMSSQESSAVEEVK . . . . . KEKSAVEQ  
C. olitorius LSGQQNGMPFASVELRRMSTASAPASMGKVP . . . . . TEEKKNP  
G. max AETRLLCAGGANWFFYWKRTMVSPAIAKVP . . . . . EKEKE  
V. unguiculata PETRFLCAGAANGFLFYWRMSMASQAEAKLP . . . . . EKDKE  
M. sativa IGQRHLYADGGNGFFYWKRRMSSQAAPSKPSAEE . . . . . TEAKSTEKNEK  
D. carota IANRQRLGIIGGARVFGTRMMSAAGE . . . . .  
S. lycopersicum SESVMMSSQRLRFSGRWRMMCSSTSKNSTKSSD . . . . . VRKEDKLSGDS  
A. thaliana PMRIHDWCGGFGDFKIGSKHVQGNFNLRWGMSSA . . . . . SAMEKKDENLTV  
A. tauschii subsp. strangulata RAVLG . . . . . GEGAWVRLMSTSAAS . . . . . QVKDEAAKAVKAEA  
T. aestivum RTDLG . . . . . GGGAWVRMMSTSAAS . . . . . QVKDEAAKGVKAEA  
H. vulgare subsp. spontaneum RTDLG . . . . . GGGAWVRMMSTSAAS . . . . . PIKDEAAKVNDAEA  
P. hallii RPLIALAGGGERGAAAVVRLSTAAEAEKAAAAASKGS . . . . . AGSTVAAKAEAAAAKGNAGSTAAAKAEAAAA  
S. officinarum . . . . .  
E. dactylifera AAGEPSYTLTLLTGSAGPAAAKPPVAALMRLFFPAR . . . . . MASTTAAAPADGSEEASEPSKSAAAAADAAKE  
E. guineensis AAVEPSYTLTLLTGSASPATAKSPVAALFRLFFPAR . . . . . MASTTAAKPAVGGEESEPSK . . . . . PAEE  
P. equestris PLNSFLFGSGTSSAAPTAVRLLQVRMASTALP . . . . . EPIGGEDDRSP  
M. alkaliphilum . . . . .

|                                | α1                                                                               | η1  | η2                                    |
|--------------------------------|----------------------------------------------------------------------------------|-----|---------------------------------------|
|                                | 0000                                                                             | 000 | 0000                                  |
| T. brucei                      | 30                                                                               | 40  | 50                                    |
|                                | 60                                                                               |     |                                       |
| T. brucei                      | TPVWGHTQLNRLSFLFETVVPVPLRVSDSESSE                                                |     |                                       |
| T. congolense                  | APVWGHTQLNRLSFLFIDAVPAVPQRAGDESSE                                                |     |                                       |
| T. vivax                       | TPVWGYTQVNRLSFVLDLVRVPAREEDESSE                                                  |     |                                       |
| A. deanei                      | QHQWGSRQLNQLSFLSFAKRLSTKEHVEIAEN                                                 |     | SY                                    |
| C. andersoni                   | KSMNGTHYHHMNNESQOQLYSAPHFRKGIOTL                                                 |     | KSEDEGEVKEYS                          |
| C. tyzzeri                     | KKR1LECKSDQINKFDAENEKVGSHFMKKS                                                   |     | HAASILEGKEYGF                         |
| B. alexandrina                 | ...TESNYGKLPNPS..DLAHFRSSSSPPVQ                                                  |     | KDDKEKDNPPIGIYAM                      |
| B. straminea                   | ...TESNYGKLPNPS..DLAHFRSSSSPPVQ                                                  |     | KDDKEKDNPPIGIYAM                      |
| B. glabrata                    | ...TETKYDKLPNPS..DLAHFRSSSSPPVK                                                  |     | KDDKEKDNPPIGIYAM                      |
| A. californica                 | VDEYRKGDFDITPDPG..NLVHFKTDALEKTP                                                 |     | KTDVQDKGKKDKEMPPIGTYVL                |
| P. canaliculata                | IKDYREGKFDKIPDPG..HLEHFRNKSERKVKVAEEGERSQOQAQVQGVQVNVPGVDGEGVQVQAQGHINEEPPMGVYAM |     |                                       |
| O. hupensis                    | VKQAELEGKFNTPDPG..HLEHFMKRSQK...TEVSSVHQSATPKSGISQSSDSRSSVNSQSATDISIFESEPPMGVYTL |     |                                       |
| P. maximos                     | VKKYKEGNFEKIPDPG..HLEHFKTSEALK                                                   |     | SVS..TTTAATTVTKVTGSTSEVETYPHPPGTHAL   |
| M. yessoensis                  | VRKYKEGNFDKIPDPE..RLEHFKTSEALK                                                   |     | TASSATVATAAGKAKVGTGSTDVTDVNSPPPVGTHAL |
| C. gigas X2                    | IKKFKEENFEKIPDPE..QLDHFRRK                                                       |     | TQSTDQLVESMKNPPPMGTHTL                |
| C. gigas X1                    | IKKFKEENFEKIPDPE..QLDHFRRK                                                       |     | TQSTDQLVESMKNPPPMGTHTL                |
| C. virginica X2                | IKKFKEGNFEKIPDPN..HLDHFRK                                                        |     | SQSTETLVESLKDPPPMGTHTL                |
| C. virginica X1                | IKKFKEGNFEKIPDPN..HLDHFRK                                                        |     | SQSTETLVESLKDPPPMGTHTL                |
| B. floridae                    | GTTVPLDLVLSVDPDHRPDLAHFRTG                                                       |     | LSPKDDLEKHHVKKDDGTMGQYSL              |
| A. planci                      | AGDSTKQKPKLAPHFRISSGK...TSAGDIHPHKAT                                             |     | TDEDENGEDSRRYLL                       |
| P. miniata                     | AEDDKKEAKKHAPHFRIALKKQPEFSGDEMSPHKAT                                             |     | TDDSKEGEDDQYLL                        |
| A. rubens                      | QGDDKGVHKKQEGDVGIEIAPAPHFRRTGIEKKAEEEE                                           |     | KSKLEKLEKDDGQYLL                      |
| A. japonica X1                 | VQKKQTSSGLAPHFKR                                                                 |     | NLDTN...KGNQEAATDVTDYLL               |
| S. pistillata                  | ASEVQQSTPAVTTQSKKPLGHFGKNGSTAG                                                   |     | ...DENYRM                             |
| O. faveolata                   | EPADEQSTPQVTTQFKEIVIDHFGKDGNTG                                                   |     | ...NEEYRM                             |
| A. tenebrosa                   | TMYTSSYCCQNLPHFKESQNDAAACKDSKKE                                                  |     | ...DSPYLL                             |
| E. diaphana                    | SLFTTTTNQQNLPHFKES..LDAKPSSANAD                                                  |     | ...DRSYLL                             |
| N. vectensis                   | LFHLSVSDAQHLPHFKENPQQPTGKSNDDP                                                   |     | ...DRPYLL                             |
| A. millepora                   | SISIVCTEKDSSPHFRERTLANEAEGGDQTLG                                                 |     | ...NEVYRM                             |
| P. damicornis                  | STTGVSQRKD..LKHFKAGAEEKDSDVNDHTRG                                                |     | ...NEIYRM                             |
| D. gigantea                    | SSSNVSNQQSTPTHFKELTGKHLPEVEEEKQIE                                                |     | ...REKAKDYIL                          |
| L. anatina                     | AEAKERSKREDEYEHFRMKEYREADEKAGKHTS                                                |     | ...GDDYLL                             |
| P. dicentrarchi                | ...QMSVKQHFKVTKKAMAQQEKQITDS                                                     |     | ...KKLYSF                             |
| A. udagawae                    | FQSIITKRPISSPTQTIKDYFPPPK..APHIK                                                 |     | ...EVETAW                             |
| P. citri                       | VNPSSRRDFSTSKPAMKKEFFPEAD..APHVK                                                 |     | ...RTQAAW                             |
| H. capsulatum                  | TSNNNVRYFSSSTRRWIKKEFFAPPK.ETDHIV                                                |     | ...ESVTTW                             |
| E. crecens                     | SNNNTRCFSSSPSRPIREFFPKNTKHLV                                                     |     | ...ESVTTW                             |
| P. hystricis                   | ISNN.RRCFSITSPSRIKEYFPPIVK..TKHIV                                                |     | ...ETETTW                             |
| T. interdigitale H6            | NNHDQGRNFSTTSPARLKEFFAAPK.QTKRIV                                                 |     | ...ETESAF                             |
| E. mesophile                   | RLASSRRHRNFSSSQQTQLDFPFPKKNLPNIK                                                 |     | ...FTPPSW                             |
| A. bisporus                    | AAERRNIASTSPAKETSELTQSAATTIPTMV                                                  |     | ...RGDWVL                             |
| P. coissans                    | ...MV                                                                            |     | ...RGDWVL                             |
| C. cinerea                     | TETRSTKSETKEAPKADPLTTESAVSTVPTMV                                                 |     | ...RGDWVL                             |
| G. lividus                     | GTEGFHREDLAPSKKALTDKSLDVTVTPVEV                                                  |     | ...RGDWVL                             |
| P. ammoniavirescens            | GTEGFHPGDLTSPKKALTEP..DAVSTVPVEV                                                 |     | ...RGDWVL                             |
| S. rosetta                     | LEGKVHVDVSVQHFRRSNNPHPLFSKVDHGNP                                                 |     | ...VWVNPV                             |
| C. cylindracea                 | FAK.SKESTSKTPLLSPSSQKREHGD                                                       |     | ...TYFL                               |
| H. sp. ATCC 50920              | GGG.LGQPSLNEGDGSAKVSDAEDAAGG                                                     |     | ...GYML                               |
| O. tauri                       | FASSAAQPAPKEDKATEVANAKRLDDPPRGAS                                                 |     | ...QGSYML                             |
| I. sp. A28L                    |                                                                                  |     |                                       |
| A. shirensis                   |                                                                                  |     |                                       |
| M. indica                      | ...EEKKDAMVSNYWGIS..RPKITREDGSE                                                  |     | ...WPWNCF                             |
| C. papaya                      | AKKDSSGDKMMLSSYWGIS..RPKITRKDGTE                                                 |     | ...WPWNCF                             |
| C. olitorius                   | ATEEQKAKDMVVSSYWGIS..RPKITREDGTE                                                 |     | ...WPWNCF                             |
| G. max                         | KEKAKAEKSVVSSYWGIS..RPKVREDGTE                                                   |     | ...WPWNCF                             |
| V. unguiculata                 | K..AEAESVVESSYWGIS..RPKIMREDGTE                                                  |     | ...WPWNCF                             |
| M. sativa                      | EESSTGKNNVVSSYWGIS..RPKIMREDGTE                                                  |     | ...WPWNCF                             |
| D. carota                      | ..NEAAKENKVSVTSYWGVA..RPKVKREDGSD                                                |     | ...WPWNCF                             |
| S. lycopersicum                | VEKMEGEDEVALSSYWGVS..RPKITKEDGSV                                                 |     | ...WPWNCF                             |
| A. thaliana                    | KKGQNGGGSVAVPSYWGIEATAMKMITRKDGSD                                                |     | ...WPWNCF                             |
| A. tauschii subsp. strangulata | AKGDGEKKEVAISSYWGIE.QSKKLVREDGTE                                                 |     | ...WKWSCF                             |
| T. aestivum                    | AKGDGEKKEVAISSYWGID.QSKKLVREDGTE                                                 |     | ...WKWSCF                             |
| H. vulgare subsp. spontaneum   | AKDEGEKKDVAISSYWGID.QLRKCLARDGTE                                                 |     | ...WKWSCF                             |
| P. hallii                      | VKEGDGKKSPPVNSYWGIE.PS.KLVNKDQVVE                                                |     | ...WKWSCF                             |
| S. officinarum                 | ...MSKDGVE                                                                       |     | ...WRWSCF                             |
| P. dactylifera                 | PSAAPANERKAITSYWGIN.PN.KVVKEDGTE                                                 |     | ...WRWSCF                             |
| E. guineensis                  | SSDASPSPERKAITASYWDIN.PN.KIVKEDGTE                                               |     | ...WKWSCF                             |
| P. equestris                   | KGOANPFGSNQMTSYWGVA.PR.KLFKEDGSE                                                 |     | ...WRWSCF                             |
| M. alkaliphilum                |                                                                                  |     |                                       |



| T. brucei           | α5    |     |     |       | α6    |     |     | α7   |      |       |       |       |       |       |       |     |   |   |   |     |      |      |      |   |   |   |    |   |   |   |   |   |   |   |   |   |   |   |   |   |   |   |   |   |   |   |   |   |   |   |   |   |   |
|---------------------|-------|-----|-----|-------|-------|-----|-----|------|------|-------|-------|-------|-------|-------|-------|-----|---|---|---|-----|------|------|------|---|---|---|----|---|---|---|---|---|---|---|---|---|---|---|---|---|---|---|---|---|---|---|---|---|---|---|---|---|---|
|                     | 130   | 140 | 150 | 160   | 170   | 180 | 190 | 200  |      |       |       |       |       |       |       |     |   |   |   |     |      |      |      |   |   |   |    |   |   |   |   |   |   |   |   |   |   |   |   |   |   |   |   |   |   |   |   |   |   |   |   |   |   |
| T. brucei           | LETVA | GVP | GMV | GGMLR | HLH   | LS  | RYM | TRDK | GW   | INTLL | LEA   | ENERM | HLM   | T     | F     | I   | E | L | R | .QP | GLPL | R    | V    | S | I | I | T  | O | A | I | M | Y | L | F | L | L | V | A | V | I |   |   |   |   |   |   |   |   |   |   |   |   |   |
| T. congolense       | LETVA | AGV | P   | GMV   | GGMLR | HLH | LS  | RYM  | TRDK | GW    | INTLL | LEA   | ENERM | HLM   | T     | F   | I | E | L | R   | .QP  | GFAP | R    | V | S | I | I  | V | T | O | A | I | M | Y | L | F | L | L | V | A | V | I |   |   |   |   |   |   |   |   |   |   |   |
| T. vivax            | LETVA | AGV | P   | GMV   | GGMLR | HLH | LS  | RYM  | TRDK | GW    | INTLL | LEA   | ENERM | HLM   | T     | F   | I | E | L | R   | .QP  | GVVF | R    | S | I | K | I  | T | O | A | I | M | Y | L | F | L | L | V | A | V | I |   |   |   |   |   |   |   |   |   |   |   |   |
| A. dexanei          | LETVA | AGV | P   | GMV   | GGMLR | HMT | S   | IRRM | EADL | GW    | IQTLL | EEA   | ENERM | HLM   | T     | F   | V | E | I | E   | R    | .QP  | GLVF | R | C | L | I  | V | A | O | G | I | M | F | N | L | L | L | A | I | V |   |   |   |   |   |   |   |   |   |   |   |   |
| C. andersoni        | LETVA | AGV | P   | GMV   | GGAMR | HLH | LS  | IRRM | RDN  | GW    | IHTLL | EEA   | ENERM | HLM   | T     | F   | I | S | L | L   | RH   | P    | PSL  | V | R | S | L  | V | L | G | A | O | F | G | L | I | Y | I | T | L | C | Y | A |   |   |   |   |   |   |   |   |   |   |
| C. tyzzeri          | LETVA | AGV | P   | GMV   | GGAMR | HLH | FSS | IRRM | KRDY | GW    | IHTLL | EEA   | ENERM | HLM   | T     | F   | I | S | L | L   | L    | IN   | P    | S | I | L | T  | V | S | V | I | G | T | O | F | A | F | L | I | F | Y | T | L | C | Y | A |   |   |   |   |   |   |   |
| B. alexandrina      | LETVA | AGV | P   | GMV   | AAAMR | HMR | S   | IRRM | QRD  | Q     | GW    | IHTLL | EEA   | ENERM | HLM   | T   | F | I | L | L   | T    | A    | L    | Q | L | K | .Q | P | S | L | M | F | R | L | C | V | I | G | S | O | G | F | F | V | T | W | F | G | I | S | Y | L |   |
| B. straminea        | LETVA | AGV | P   | GMV   | AAAMR | HMR | S   | IRRM | QRD  | Q     | GW    | IHTLL | EEA   | ENERM | HLM   | T   | F | I | L | L   | T    | A    | L    | Q | L | K | .Q | P | S | L | M | F | R | L | C | V | I | G | S | O | G | F | F | V | T | W | F | G | I | S | Y | L |   |
| B. glabrata         | LETVA | AGV | P   | GMV   | AAAMR | HMR | S   | IRRM | QRD  | Q     | GW    | IHTLL | EEA   | ENERM | HLM   | T   | F | I | L | L   | T    | A    | L    | Q | L | K | .Q | P | S | L | L | F | R | L | C | V | I | G | S | O | G | F | F | V | T | W | F | G | I | S | Y | L |   |
| A. californica      | LETVA | AGV | P   | GMV   | AAAMR | HMR | S   | IRRM | QRD  | Q     | GW    | IHTLL | EEA   | ENERM | HLM   | T   | F | I | L | L   | T    | A    | L    | Q | L | K | .Q | P | S | L | F | F | R | L | C | V | I | G | S | O | G | F | F | V | T | W | F | G | I | S | Y | L |   |
| P. canaliculata     | LETVA | AAV | P   | GMV   | AAAMR | HMR | S   | IRRM | QRD  | H     | GW    | IHTLL | EEA   | ENERM | HLM   | T   | F | I | L | L   | T    | A    | L    | Q | L | K | .Q | P | S | T | L | F | R | M | S | V | I | G | O | G | F | F | V | T | M | F | V | W | Y | A | V |   |   |
| O. hupensis         | LETVA | AGV | P   | GMV   | AAAMR | HMR | S   | IRRM | QRD  | H     | GW    | IHTLL | EEA   | ENERM | HLM   | T   | F | I | L | L   | T    | A    | L    | Q | L | K | .Q | P | S | W | F | F | R | T | A | V | I | G | S | O | G | F | F | V | T | L | F | S | Y | A | V |   |   |
| P. maximus          | LETVA | AGV | P   | GMV   | AAAMR | HMR | S   | IRRM | QRD  | H     | GW    | IHTLL | EEA   | ENERM | HLM   | T   | F | I | L | L   | T    | A    | L    | Q | L | K | .Q | P | T | W | L | F | R | G | C | V | I | G | A | O | G | F | F | V | T | F | S | F | A | Y | L |   |   |
| M. yessoensis       | LETVA | AGV | P   | GMV   | AAAMR | HMR | S   | IRRM | QRD  | H     | GW    | IHTLL | EEA   | ENERM | HLM   | T   | F | I | L | L   | T    | A    | L    | Q | L | K | .Q | P | T | R | L | F | R | G | C | V | I | G | A | O | G | F | F | V | T | F | S | F | A | Y | L |   |   |
| C. gigas X2         | LETVA | AGV | P   | GMV   | AAAMR | HMR | S   | IRRM | QRD  | H     | GW    | IHTLL | EEA   | ENERM | HLM   | T   | F | I | L | L   | T    | A    | L    | Q | L | K | .Q | P | S | W | L | F | R | S | G | V | I | G | O | G | F | F | V | T | M | F | S | I | A | Y | L |   |   |
| C. gigas X1         | LETVA | AGV | P   | GMV   | AAAMR | HMR | S   | IRRM | QRD  | H     | GW    | IHTLL | EEA   | ENERM | HLM   | T   | F | I | L | L   | T    | A    | L    | Q | L | K | .Q | P | S | W | L | F | R | S | G | V | I | G | O | G | F | F | V | T | M | F | S | I | A | Y | L |   |   |
| C. virginica X2     | LETVA | AGV | P   | GMV   | AAAMR | HMR | S   | IRRM | QRD  | H     | GW    | IHTLL | EEA   | ENERM | HLM   | T   | F | I | L | L   | T    | A    | L    | Q | L | K | .Q | P | T | W | L | F | R | M | G | V | I | G | O | G | F | F | V | T | M | F | S | I | A | Y | L |   |   |
| C. virginica X1     | LETVA | AGV | P   | GMV   | AAAMR | HMR | S   | IRRM | QRD  | H     | GW    | IHTLL | EEA   | ENERM | HLM   | T   | F | I | L | L   | T    | A    | L    | Q | L | K | .Q | P | T | W | L | F | R | M | G | V | I | G | O | G | F | F | V | T | M | F | S | I | A | Y | L |   |   |
| B. floridae         | LETVA | AGV | P   | GMV   | AAAMR | HMR | S   | IRRM | QRD  | H     | GW    | IHTLL | EEA   | ENERM | HLM   | T   | F | I | L | L   | T    | A    | L    | Q | L | K | .Q | P | N | S | A | L | F | R | W | C | V | V | F | A | O | G | T | F | V | T | L | F | S | A | A | Y | L |
| A. planci           | LETVA | AGV | P   | GMV   | AAAMR | HMR | S   | IRRM | QRD  | H     | GW    | IHTLL | EEA   | ENERM | HLM   | T   | F | I | L | L   | T    | A    | L    | Q | L | K | .Q | P | K | R | L | F | T | M | A | V | L | T | O | G | I | F | V | N | M | F | L | A | Y | L |   |   |   |
| P. miniata          | LETVA | AGV | P   | GMV   | AAAMR | HMR | S   | IRRM | QRD  | F     | GW    | IHTLL | EEA   | ENERM | HLM   | T   | F | I | L | L   | T    | A    | L    | Q | L | K | .Q | P | K | G | L | F | T | M | G | V | L | L | T | O | G | I | F | V | N | M | F | L | A | Y | L |   |   |
| A. rubens           | LETVA | AGV | P   | GMV   | AAAMR | HMR | S   | IRRM | QRD  | H     | GW    | IHTLL | EEA   | ENERM | HLM   | T   | F | I | L | L   | T    | A    | L    | Q | L | K | .Q | P | K | G | L | F | T | M | G | V | L | L | T | O | G | I | F | V | N | M | F | L | A | Y | L |   |   |
| A. japonica X1      | LETVA | AGV | P   | GMV   | GGMLR | HLH | S   | IRRM | RDN  | H     | GW    | IHTLL | EEA   | ENERM | HLM   | T   | F | I | L | L   | T    | A    | L    | E | L | K | .Q | P | K | S | K | F | T | L | A | V | L | G | A | O | G | I | F | V | N | I | F | F | A | Y | L |   |   |
| S. pistillata       | LETVA | AGV | P   | GMV   | GGMLR | HMR | S   | IRRM | QRD  | H     | GW    | IHTLL | EEA   | ENERM | HLM   | T   | F | I | L | L   | T    | A    | L    | E | M | K | .Q | P | G | I | L | F | R | G | A | V | L | L | A | O | G | I | F | V | N | L | F | F | A | Y | L |   |   |
| O. faeulata         | LETVA | AGV | P   | GMV   | GGMLR | HMR | S   | IRRM | RDN  | H     | GW    | IHTLL | EEA   | ENERM | HLM   | T   | F | I | L | L   | T    | A    | L    | E | M | K | .Q | P | G | V | I | F | R | G | T | I | L | L | A | O | G | I | F | V | N | L | F | F | A | Y | L |   |   |
| A. tenebrosa        | LETVA | AGV | P   | GMV   | GGMAR | HLH | S   | IRRM | RDN  | H     | GW    | IHTLL | EEA   | ENERM | HLM   | T   | F | I | L | L   | T    | A    | L    | E | M | K | .Q | P | G | A | L | F | R | G | V | I | A | A | O | G | I | F | V | N | M | F | L | A | Y | L |   |   |   |
| E. diaphana         | LETVA | AGV | P   | GMV   | GGMAR | HLH | S   | IRRM | RDN  | H     | GW    | IHTLL | EEA   | ENERM | HLM   | T   | F | I | L | L   | T    | A    | L    | E | L | K | .Q | P | G | T | L | F | R | G | V | I | L | A | O | G | I | F | V | N | M | F | L | A | Y | L |   |   |   |
| N. vectensis        | LETVA | AGV | P   | GMV   | GGMLR | HMR | S   | IRRM | RDN  | H     | GW    | IHTLL | EEA   | ENERM | HLM   | T   | F | I | L | L   | T    | A    | L    | E | L | K | .Q | P | G | I | L | F | R | G | V | I | L | A | O | G | I | F | V | N | M | F | L | A | Y | L |   |   |   |
| A. millepora        | LETVA | AGV | P   | GMV   | GGMAR | HMR | S   | IRRM | RDN  | H     | GW    | IHTLL | EEA   | ENERM | HLM   | T   | F | I | L | L   | T    | A    | L    | E | L | K | .Q | P | G | M | L | F | R | G | V | I | L | L | A | O | G | I | F | V | N | M | F | L | A | Y | L |   |   |
| P. damicornis       | LETVA | AGV | P   | GMV   | GGMAR | HMR | S   | IRRM | RDN  | H     | GW    | IHTLL | EEA   | ENERM | HLM   | T   | F | I | L | L   | T    | A    | L    | E | L | K | .Q | P | G | A | L | F | R | G | V | I | L | L | A | O | G | I | F | V | N | M | F | L | A | Y | L |   |   |
| D. gigantea         | LETVA | AGV | P   | GMV   | GGMAR | HMR | S   | IRRM | RDN  | H     | GW    | IHTLL | EEA   | ENERM | HLM   | T   | F | I | L | L   | T    | A    | L    | E | L | K | .Q | P | G | L | I | F | R | G | M | V | L | L | A | O | G | I | F | V | N | M | F | L | A | Y | L |   |   |
| L. anatina          | LETVA | AGV | P   | GMV   | AAAMR | HMR | S   | IRRM | QRD  | H     | GW    | IHTLL | EEA   | ENERM | HLM   | T   | F | I | L | L   | T    | A    | I    | Q | L | R | .Q | P | G | L | P | F | R | G | V | I | L | A | O | G | I | F | V | N | M | F | L | A | Y | L |   |   |   |
| P. dicentrarchi     | LETVA | AGV | P   | GMV   | GGMAR | HMR | S   | IRRM | QRD  | H     | GW    | IHTLL | EEA   | ENERM | HLM   | T   | F | I | L | L   | T    | A    | L    | Q | L | K | .Q | P | S | N | I | F | R | M | G | V | I | F | A | O | G | I | F | V | N | M | F | L | A | Y | L |   |   |
| A. udagawae         | LESVA | AGV | P   | GMV   | GGMLR | HLH | S   | IRRM | RDN  | Q     | GW    | IETLL | EEA   | ENERM | HLM   | T   | F | L | K | L   | A    | .E   | P    | G | W | F | M  | R | L | M | V | L | G | A | O | G | I | F | V | N | M | F | L | A | Y | L |   |   |   |   |   |   |   |
| P. citri            | LESVA | AGV | P   | GMV   | GGMLR | HLH | S   | IRRM | RDN  | Q     | GW    | IETLL | EEA   | ENERM | HLM   | T   | F | L | K | L   | M    | A    | .E   | P | G | W | F  | M | R | L | M | V | L | G | A | O | G | I | F | V | N | M | F | L | A | Y | L |   |   |   |   |   |   |
| H. capsulatum       | LETVA | AGV | P   | GMV   | GGMLR | HLH | S   | IRRM | RDN  | Q     | GW    | IETLL | EEA   | ENERM | HLM   | T   | F | L | K | L   | A    | .E   | P    | G | W | F | M  | R | L | M | V | L | G | A | O | G | I | F | V | N | M | F | L | A | Y | L |   |   |   |   |   |   |   |
| E. crescens         | LETVA | AGV | P   | GMV   | GGMLR | HLH | S   | IRRM | RDN  | Q     | GW    | IETLL | EEA   | ENERM | HLM   | T   | F | L | K | L   | A    | .E   | P    | G | W | F | M  | R | L | M | V | L | G | A | O | G | I | F | V | N | M | F | L | A | Y | L |   |   |   |   |   |   |   |
| P. hystricis        | LETVA | AGV | P   | GMV   | GGMLR | HLH | S   | IRRM | RDN  | Q     | GW    | IETLL | EEA   | ENERM | HLM   | T   | F | L | K | L   | A    | .E   | P    | G | W | F | M  | R | L | M | V | L | G | A | O | G | I | F | V | N | M | F | L | A | Y | L |   |   |   |   |   |   |   |
| T. interdigitale H6 | LETVA | AGV | P   | GMV   | GGMLR | HLH | S   | IRRM | RDN  | Q     | GW    | IETLL | EEA   | ENERM | HLM   | T   | F | L | K | L   | A    | .E   | P    | G | W | F | M  | R | L | M | V | L | G | A | O | G | I | F | V | N | M | F | L | A | Y | L |   |   |   |   |   |   |   |
| E. mesophile        | LETVA | AGV | P   | GMV   | GGMLR | HLH | S   | IRRM | RDN  | Q     | GW    | IETLL | EEA   | ENERM | HLM   | T   | F | L | K | L   | M    | A    | .E   | P | G | W | F  | M | R | L | M | V | L | G | A | O | G | I | F | V | N | M | F | L | A | Y | L |   |   |   |   |   |   |
| A. bisporus         | LESVA | AGV | P   | GMV   | AAATL | RH  | L   | S    | IRRM | RDN   | Q     | GW    | IHTC  | LEA   | ENERM | HLM | T | F | M | S   | L    | R    | .K   | P | S | I | F  | F | R | A | L | V | L | G | A | O | G | I | F | V | N | M | F | L | A | Y | L |   |   |   |   |   |   |
| P. conissans        | LETVA | AGV | P   | GMV   | AAATL | RH  | L   | S    | IRRM | RDN   | Q     | GW    | IHTC  | LEA   | ENERM | HLM | T | F | M | S   | L    | R    | .K   | P | S | I | F  | F | R | A | L | V | L | G | A | O | G | I | F | V | N | M | F | L | A | Y | L |   |   |   |   |   |   |
| C. cinerea          | LESVA | AGV | P   | GMV   | AAATL | RH  | L   | S    | IRRM | RDN   | Q     | GW    | IHTC  | LEA   | ENERM | HLM | T | F | M | S   | L    | R    | .K   | P | S | I | F  | F | R | A | L | V | L | G | A | O | G | I | F | V | N | M | F | L | A | Y | L |   |   |   |   |   |   |
| G. lividus          | LETVA | AGV | P   | GMV   |       |     |     |      |      |       |       |       |       |       |       |     |   |   |   |     |      |      |      |   |   |   |    |   |   |   |   |   |   |   |   |   |   |   |   |   |   |   |   |   |   |   |   |   |   |   |   |   |   |

| T. brucei       | α8    |     |        |     |     |   |    |     |     |   | α9  |    |     |   |    | T. T |     | α10 |   |   |   |   |     |   |   |    |   |   |   |   |   |   |   |   |   |   |   |   |   |   |   |   |   |   |   |   |   |   |   |   |   |   |   |   |   |   |   |     |   |   |   |   |   |   |   |   |   |   |   |   |   |   |   |
|-----------------|-------|-----|--------|-----|-----|---|----|-----|-----|---|-----|----|-----|---|----|------|-----|-----|---|---|---|---|-----|---|---|----|---|---|---|---|---|---|---|---|---|---|---|---|---|---|---|---|---|---|---|---|---|---|---|---|---|---|---|---|---|---|---|-----|---|---|---|---|---|---|---|---|---|---|---|---|---|---|---|
|                 | 210   |     |        | 220 |     |   |    | 230 |     |   | 240 |    | 250 |   |    |      |     | 260 |   |   |   |   | 270 |   |   |    |   |   |   |   |   |   |   |   |   |   |   |   |   |   |   |   |   |   |   |   |   |   |   |   |   |   |   |   |   |   |   |     |   |   |   |   |   |   |   |   |   |   |   |   |   |   |   |
| T. brucei       | SPRFV | HRF | VGYLEE | BAV | ITY | T | GV | MR  | AID | E | G   | .. | RLR | P | T  | K    | N   | D   | V | E | V | A | R   | V | Y | W  | N | L | S | K | . | N | A | T | F | R | D | L | I | N | V | I | R | A | D | E | A | H | R | V | V | N | H | T | F |   |   |     |   |   |   |   |   |   |   |   |   |   |   |   |   |   |   |
| T. congolense   | SPRFV | HRF | VGYLEE | BAV | ITY | T | S  | L   | R   | A | I   | D  | E   | G | .. | RLR  | P   | T   | K | S | D | V | E   | V | A | R  | V | Y | W | N | L | S | K | . | N | A | T | F | R | D | L | I | N | V | I | R | A | D | E | A | H | R | V | V | N | H | T | F   |   |   |   |   |   |   |   |   |   |   |   |   |   |   |   |
| T. vivax        | SPRFV | HRF | VGYLEE | BAV | V   | T | T  | G   | L   | R | A   | I  | D   | E | G  | ..   | RLP | M   | K | N | A | V | P   | D | V | A  | R | V | Y | W | G | L | N | K | . | D | A | T | F | R | D | L | I | N | V | I | R | A | D | E | A | H | R | V | V | N | H | T   | F |   |   |   |   |   |   |   |   |   |   |   |   |   |   |
| A. deanei       | SPRFV | HRF | VGYLEE | QAV | ITY | T | D  | L   | G   | H | I   | E  | K   | G | .. | E    | L   | Q   | F | S | A | T | R   | V | P | L  | A | I | T | Y | W | G | L | N | K | . | K | A | S | F | H | D | L | I | N | V | I | R | A | D | E | A | H | R | V | V | N | H   | T | F |   |   |   |   |   |   |   |   |   |   |   |   |   |
| C. andersoni    | SPKYC | HRF | VGYLEE | BAV | R   | T | T  | R   | L   | I | A   | D  | I   | D | G  | ..   | K   | L   | P | E | T | S | P   | A | P | C  | R | A | K | L | Y | Y | G | L | P | K | . | D | A | T | L | K | D | V | I | L | A | M | R | R | D | E | S | H | R | D | V | N   | H | L |   |   |   |   |   |   |   |   |   |   |   |   |   |
| C. tyzzeri      | SPKYS | HRF | VGYLEE | BAV | T   | T | H  | L   | I   | E | I   | D  | K   | G | .. | L    | L   | P   | E | F | E | R | K   | A | P | F  | A | S | V | Y | Y | G | L | P | K | . | D | A | T | I | R | D | L | I | L | A | M | R | R | D | E | S | H | R | D | V | N | H   | L |   |   |   |   |   |   |   |   |   |   |   |   |   |   |
| B. alexandrina  | SPKYC | HRF | VGYLEE | BAV | K   | T | T  | N   | C   | L | K   | D  | I   | E | Q  | G    | ..  | N   | M | Q | H | W | K   | T | Q | P  | A | D | V | A | V | Y | W | K | L | P | K | . | D | A | T | M | K | D | V | I | L | A | I | R | A | D | E | A | H | R | V | V   | N | H | C | L |   |   |   |   |   |   |   |   |   |   |   |
| B. straminea    | SPKYC | HRF | VGYLEE | BAV | K   | T | T  | N   | C   | L | K   | D  | I   | E | Q  | G    | ..  | N   | M | K | H | W | K   | T | Q | P  | A | D | V | A | V | Y | W | K | L | P | K | . | D | S | T | M | K | D | V | I | L | A | I | R | A | D | E | A | H | R | V | V   | N | H | C | L |   |   |   |   |   |   |   |   |   |   |   |
| B. glabrata     | SPKYC | HRF | VGYLEE | BAV | K   | T | T  | N   | C   | L | K   | D  | I   | E | Q  | G    | ..  | N   | M | Q | H | W | K   | T | Q | P  | A | D | V | A | V | Y | W | K | L | P | K | . | D | S | T | M | K | D | V | I | L | A | I | R | A | D | E | A | H | R | V | V   | N | H | C | L |   |   |   |   |   |   |   |   |   |   |   |
| A. californica  | SPKF  | CHR | VGYLEE | BAV | K   | T | T  | K   | C   | L | E   | D  | I   | N | D  | G    | ..  | P   | M | Q | H | W | K   | T | Q | P  | A | D | V | A | I | Y | W | K | L | P | K | . | E | A | T | M | K | D | V | I | L | A | I | R | A | D | E | A | H | R | V | V   | N | H | S | L |   |   |   |   |   |   |   |   |   |   |   |
| P. canaliculate | SPRF  | CHR | VGYLEE | BAV | K   | T | S  | K   | C   | L | E   | D  | M   | E | H  | G    | ..  | S   | I | I | H | W | T   | L | P | A  | P | V | A | I | Y | W | R | L | P | K | . | N | A | K | L | R | D | V | I | L | A | I | R | A | D | E | A | H | R | V | V | N   | H | T | L |   |   |   |   |   |   |   |   |   |   |   |   |
| O. hupensis     | SPRF  | CHR | VGYLEE | BAV | K   | T | S  | K   | C   | L | E   | D  | I   | R | G  | ..   | P   | M   | K | H | W | T | V   | P | A | P  | V | A | I | Y | W | K | L | P | K | . | D | A | K | M | D | V | I | L | A | I | R | A | D | E | A | H | R | V | V | N | H | T   | L |   |   |   |   |   |   |   |   |   |   |   |   |   |   |
| P. maximus      | SPRF  | CHR | VGYLEE | BAV | K   | T | S  | K   | C   | L | K   | D  | I   | K | D  | G    | ..  | P   | M | K | H | W | T   | Q | E | A  | P | D | L | A | I | Y | W | K | L | P | K | . | N | A | T | M | L | D | V | I | L | A | I | R | A | D | E | A | H | R | V | V   | N | H | T | L |   |   |   |   |   |   |   |   |   |   |   |
| M. yessocensis  | SPRF  | CHR | VGYLEE | BAV | ITY | T | K  | C   | I   | K | D   | I  | K   | D | G  | ..   | P   | M   | K | H | W | T | Q   | E | A | P  | D | L | A | I | Y | W | K | L | P | K | . | N | A | T | M | L | D | V | I | L | A | I | R | A | D | E | A | H | R | V | V | N   | H | T | L |   |   |   |   |   |   |   |   |   |   |   |   |
| C. gigas X2     | SPRF  | CHR | VGYLEE | BAV | T   | T | S  | K   | C   | L | D   | I  | E   | S | G  | ..   | S   | L   | K | H | W | T | Q   | E | A | P  | D | V | A | I | Y | W | K | L | P | N | K | . | N | G | T | M | K | D | V | I | F | N | I | R | A | D | E | A | H | R | V | K   | V | N | H | V | L |   |   |   |   |   |   |   |   |   |   |
| C. gigas X1     | SPRF  | CHR | VGYLEE | BAV | F   | T | S  | K   | C   | L | K   | D  | I   | E | S  | G    | ..  | S   | L | K | H | W | T   | I | K | A  | A | P | D | V | A | I | Y | W | K | L | P | K | . | T | A | S | M | K | D | V | I | L | A | I | R | A | D | E | A | H | R | V   | V | N | H | T | L |   |   |   |   |   |   |   |   |   |   |
| C. virginica X2 | SPRF  | CHR | VGYLEE | BAV | F   | T | S  | K   | C   | L | K   | D  | I   | E | S  | G    | ..  | P   | L | K | H | W | T   | Q | K | A  | P | D | V | A | I | Y | W | K | L | P | K | . | P | A | T | M | K | D | V | I | F | N | I | R | A | D | E | A | H | R | V | K   | V | N | H | V | L |   |   |   |   |   |   |   |   |   |   |
| C. virginica X1 | SPRF  | CHR | VGYLEE | BAV | F   | T | S  | K   | C   | L | K   | D  | I   | E | S  | G    | ..  | P   | L | K | H | W | T   | Q | K | A  | P | D | V | A | I | Y | W | K | L | P | K | . | T | A | S | M | K | D | V | I | L | A | I | R | A | D | E | A | H | R | V | V   | N | H | T | L |   |   |   |   |   |   |   |   |   |   |   |
| B. floridae     | SPRF  | CHR | VGYLEE | BAV | K   | T | T  | K   | C   | L | E   | D  | F   | D | S  | G    | ..  | R   | L | P | L | W | S   | D | M | E  | A | P | L | A | K | R | Y | W | S | L | P | K | . | D | A | M | M | R | D | V | I | L | A | I | R | A | D | E | A | H | R | L   | V | N | H | T | L |   |   |   |   |   |   |   |   |   |   |
| A. planci       | SPRF  | CHR | VGYLEE | BAV | ITY | T | K  | L   | I   | Q | D   | L  | N   | K | .  | K    | L   | L   | V | W | G | N | M   | A | P | D  | L | A | I | Y | W | K | L | P | K | . | D | A | N | M | R | D | I | L | A | I | R | A | D | E | A | H | R | V | K | V | N | H   | F | L |   |   |   |   |   |   |   |   |   |   |   |   |   |
| P. miniata      | SPRF  | CHR | VGYLEE | BAV | ITY | T | K  | L   | I   | Q | D   | L  | D   | D | G  | ..   | K   | L   | S | V | W | G | N   | M | A | P  | D | L | A | I | Y | W | K | M | K | . | D | A | N | M | R | D | I | L | A | I | R | A | D | E | A | H | R | V | E | N | H | S   | L |   |   |   |   |   |   |   |   |   |   |   |   |   |   |
| A. rubens       | SPRF  | CHR | VGYLEE | BAV | ITY | T | K  | L   | I   | Q | D   | L  | D   | D | G  | ..   | K   | L   | K | V | W | G | N   | M | A | P  | D | L | A | V | Y | W | K | L | P | K | . | D | A | L | M | R | D | M | L | A | I | R | A | D | E | A | H | R | V | E | N | H   | S | L |   |   |   |   |   |   |   |   |   |   |   |   |   |
| A. japonica X1  | SPCF  | CHR | VGYLEE | BAV | K   | T | T  | M   | L   | I | Q   | E  | I   | D | D  | G    | ..  | T   | M | A | E | W | N   | K | A | S  | P | D | I | A | T | Y | W | K | L | P | K | . | D | A | M | M | R | D | V | I | L | A | I | R | A | D | E | A | H | R | D | V   | N | H | T | L |   |   |   |   |   |   |   |   |   |   |   |
| S. pistillata   | SPKF  | CHR | VGYLEE | BAV | K   | T | T  | H   | C   | I | E   | C  | I   | D | G  | ..   | K   | L   | P | L | W | E | N   | L | L | A  | P | K | I | A | V | Y | W | K | L | P | K | . | G | S | K | M | R | D | V | I | L | A | I | R | A | D | E | A | H | R | V | N   | H | T | L |   |   |   |   |   |   |   |   |   |   |   |   |
| O. faveolata    | SPKF  | CHR | VGYLEE | BAV | K   | T | T  | H   | C   | L | E   | C  | I   | D | S  | G    | ..  | K   | L | P | L | W | E   | N | L | L  | A | P | K | I | A | V | Y | W | K | L | P | K | . | G | S | T | M | R | D | V | I | L | A | I | R | A | D | E | A | H | R | V   | V | N | H | T | L |   |   |   |   |   |   |   |   |   |   |
| A. tenebrosa    | SPRF  | CHR | VGYLEE | BAV | K   | T | T  | Y   | C   | L | K   | C  | I   | D | E  | G    | ..  | K   | L | P | K | W | E   | Q | M | K  | A | P | I | A | V | Y | W | K | L | P | K | . | D | A | M | M | R | D | V | I | L | A | I | R | A | D | E | A | H | R | V | V   | N | H | T | L |   |   |   |   |   |   |   |   |   |   |   |
| E. diaphana     | SPRF  | CHR | VGYLEE | BAV | K   | T | T  | Y   | C   | L | E   | C  | I   | D | N  | G    | ..  | K   | L | P | V | W | K   | L | A | P  | I | A | V | Y | W | K | L | P | K | . | D | A | M | M | R | D | V | I | L | A | I | R | A | D | E | A | H | R | V | V | N | H   | T | L |   |   |   |   |   |   |   |   |   |   |   |   |   |
| N. vectensis    | SPRF  | CHR | VGYLEE | BAV | K   | T | T  | Y   | C   | L | E   | C  | I   | D | N  | G    | ..  | K   | L | P | T | W | N   | L | L | A  | P | I | A | S | N | Y | W | K | L | P | K | . | D | A | V | M | R | D | V | I | L | A | I | R | A | D | E | A | H | R | V | V   | N | H | T | L |   |   |   |   |   |   |   |   |   |   |   |
| A. millepora    | SPRF  | CHR | VGYLEE | BAV | K   | T | T  | Y   | C   | L | E   | C  | I   | D | E  | G    | ..  | T   | L | L | I | W | T   | K | P | A  | P | L | A | V | Y | W | R | L | P | K | . | G | A | V | M | R | D | V | I | L | A | I | R | A | D | E | A | H | R | V | V | N   | H | T | L |   |   |   |   |   |   |   |   |   |   |   |   |
| P. damicornis   | SPRF  | CHR | VGYLEE | BAV | K   | T | T  | Y   | C   | L | E   | C  | I   | D | D  | G    | ..  | T   | L | P | V | W | S   | T | R | P  | A | P | L | A | I | Y | W | R | L | P | K | . | D | A | V | M | R | D | V | I | L | A | I | R | A | D | E | A | H | R | V | V   | N | H | T | L |   |   |   |   |   |   |   |   |   |   |   |
| D. gigantea     | SPRF  | CHR | VGYLEE | BAV | K   | T | T  | Y   | C   | L | E   | S  | I   | D | S  | G    | ..  | A   | L | S | V | W | E   | N | K | P  | A | P | I | A | K | R | Y | W | R | L | P | K | . | D | C | T | M | R | D | V | I | L | A | I | R | A | D | E | A | H | R | V   | K | V | N | H | T | L |   |   |   |   |   |   |   |   |   |
| L. anatina      | SPRY  | CHR | VGYLEE | BAV | K   | T | T  | K   | L   | D | I   | D  | I   | A | G  | ..   | C   | L   | T | E | W | N | I   | K | P | A  | P | I | A | I | Y | W | N | M | S | P | . | N | A | V | M | R | D | V | I | L | N | L | R | A | D | E | T | H | R | E | V | N   | H | S | F |   |   |   |   |   |   |   |   |   |   |   |   |
| P. dicentrarchi | FPR   | V   | T      | H   | R   | V | G  | Y   | L   | E | E   | B  | A   | V | K  | T    | Y   | T   | H | C | L | E | S   | I | E | K  | E | N | S | P | L | S | H | W | T | K | A | P | E | I | A | K | Y | W | N | L | G | E | . | N | A | T | M | K | D | V | V | Y   | A | V | R | K | D | E | H | H | K | D | V | N | E | D | F |
| A. udagawae     | SPRI  | CHR | VGYLEE | BAV | ITY | T | T  | R   | A   | I | K   | D  | I   | E | T  | ..   | G   | K   | L | P | W | E | K   | L | D | A  | P | E | I | A | I | Y | W | N | M | P | E | G | R | . | K | M | D | L | L | Y | V | R | A | D | E | A | K | H | R | E | V | N   | H | T | L |   |   |   |   |   |   |   |   |   |   |   |   |
| P. citri        | SPRI  | A   | H      | R   | F   | V | G  | Y   | L   | E | E   | B  | A   | V | M  | T    | Y   | R   | E | I | E | D | I   | D | A | .. | G | R | L | P | N | W | A | K | M | Q | A | P | E | I | A | V | Y | W | N | M | P | E | G | K | R | S | M | D | L | L | Y | I   | R | A | D | E | S | K | H | R | E | V | N | H | T | L |   |
| H. capsulatum   | SPRT  | CHR | VGYLEE | BAV | M   | T | Y  | H   | A   | I | K   | D  | L   | E | S  | ..   | G   | K   | L | P | N | W | A   | N | Q | A  | P | D | I | A | V | Y | W | M | P | E | G | R | . | I | L | D | L | L | Y | I | R | A | D | E | A | K | H | R | E | V | N | H</ |   |   |   |   |   |   |   |   |   |   |   |   |   |   |   |

| T. brucei                      | η3    |              |                 |               |                 |
|--------------------------------|-------|--------------|-----------------|---------------|-----------------|
|                                | 00000 | 290          | 300             | 310           | 320             |
|                                | 280   | 290          | 300             | 310           | 320             |
| T. brucei                      | AD    | MHEKRLQNSVNF | FVVLKKNPEEMYS   | NQPSGKTRTDFG  | SEGAKTASNVNKHV  |
| T. congolense                  | AD    | MHEHHLQNSVNF | FVVLKKNPAELYND  | QGAIKGAAACAAG | ATTKSS          |
| T. vivax                       | AD    | MHAKRLQNCVNF | FVVLKTNPELLYANA | APVADKTMSERES | GLKDGKLSH       |
| A. deanei                      | AD    | MHSHNLCRNP   | NPFVAVLKQ       | TDSK          |                 |
| C. andersoni                   | AI    | LKPG.DPNP    | FASKV           |               |                 |
| C. tyzzeri                     | AD    | IRLN.GE      |                 |               |                 |
| B. alexandrina                 | AS    | LKRD.DFNP    | YKPGH           |               |                 |
| B. straminea                   | AS    | LKRD.DFNP    | YKPGQ           |               |                 |
| B. glabrata                    | AS    | LKRD.DFNP    | YKPGH           |               |                 |
| A. californica                 | AS    | LKRD.EFNP    | YKPGK           |               |                 |
| P. canaliculate                | AS    | LKRD.EFNP    | YKPGH           |               |                 |
| O. hupensis                    | AS    | LKAN.QFNP    | YKPGQ           |               |                 |
| P. maximus                     | AS    | LKED.DYNP    | YKPGK           |               |                 |
| M. yessoensis                  | AS    | LKED.DYNP    | YKPGK           |               |                 |
| C. gigas X2                    | AS    | MKTD.QYNP    | FLPGQ           |               |                 |
| C. gigas X1                    | AS    | MKED.EYNP    | YEPGK           |               |                 |
| C. virginica X2                | AS    | LPTD.KYNP    | FLPGQ           |               |                 |
| C. virginica X1                | AS    | MKED.EYNP    | YEPGK           |               |                 |
| B. floridae                    | SD    | LKRD.DPNP    | FQPGK           |               |                 |
| A. planci                      | SD    | LKPD.DSNP    | FPPGQ           |               |                 |
| P. miniata                     | SD    | LKPD.ESNP    | FPPGQ           |               |                 |
| A. rubens                      | SD    | LKSD.DSNP    | FPPGQ           |               |                 |
| A. japonica X1                 | GT    | LNLT.DQNP    | FPPGK           |               |                 |
| S. pistillata                  | SS    | LPLC.APNP    | FHPGK           |               |                 |
| O. faveolata                   | SS    | LPLC.APNP    | FHPGK           |               |                 |
| A. tenebrosa                   | GT    | LNPH.EPNP    | FLPGRK          |               |                 |
| E. diaphana                    | SS    | IHL.DPNP     | FHPGRK          |               |                 |
| N. vectensis                   | SS    | IHL.DPNP     | FHPGRK          |               |                 |
| A. millepora                   | SS    | IHLN.EKNP    | FSPGK           |               |                 |
| P. damicornis                  | SS    | IHLN.EKNP    | FSPGK           |               |                 |
| D. gigantea                    | AS    | MHLD.QQNP    | FEPWERK         |               |                 |
| L. anatina                     | ANN   | MNRN.PHVHNQ  | KPGDKKAINAD     | QCRHTG        | PCKCKV          |
| P. dicentrarchi                | AD    | YTYQ.QQNP    | YSPEQ           |               |                 |
| A. udagawae                    | GN    | LQONADPNP    | YAAKYKDP        | SKPHPTKGIEN   | LKPTGWERDEII    |
| P. citri                       | GN    | LQKNDPNP     | YVSEYKKG        | TKPHPTKDL     | SYRPHGWERDDAI   |
| H. capsulatum                  | AN    | LKQGVDPNP    | YASKYDNPE       | APHPTKS       | AEIVKPTGWERDEVI |
| E. crescens                    | AN    | LNAQAVDPNP   | YAVKYDNPE       | PHPTKS        | AAIKPTGWERKDV   |
| P. hystricis                   | AN    | LNOGTDPNP    | YASKYDDP        | KEVRPTK       | TAEVVKTGWERDEV  |
| T. interdigitale H6            | AN    | LNQKIDPNP    | YAAKYENPE       | KPHPTKS       | AEIVKPTGWRQDVI  |
| E. mesophile                   | AN    | LKAE.DPNP    | FVSVYKDP        | TKPHPGPS      | IEHIKSKGWEREDVI |
| A. bisporus                    | AN    | LQQRSDVNP    | FALREPD         | MHVKGS        | RVEFKRQSESEYAKV |
| P. conissans                   | AN    | LNHSTDVNP    | FALREPD         | MVLKQKIE      | FQRSESEYVKQSHDL |
| C. cinerea                     | AN    | LNHSTDVNP    | FALREPD         | MHTKGGKIE     | FERHEAEAYIKES   |
| G. lividus                     | AN    | LNPAAADVNP   | FALSEPDM        | FVKGKLG       | FERSEAEKYVQES   |
| P. ammoniavirescens            | AN    | LNQSTDVNP    | FAFSEPD         | MVLKGGKLG     | FERSEAEKYVQETH  |
| S. rosetta                     | S     | LTKTTD       | VNPVYSGK        |               |                 |
| C. cylindracea                 | GN    | MGKE.QTNP    | FDKHSHTVP       |               |                 |
| H. sp. ATCC 50920              | SQ    | MKAS.DENP    | FVPGTHQIS       |               |                 |
| O. tauri                       | SS    | MGIR.QANP    | FHVGHTELP       | ENFVDP        | PPPGFVPEHCR     |
| I. sp. A28L                    | AD    | E            | LKSGARK         |               |                 |
| A. shirensis                   | AD    | E            | LKARK           |               |                 |
| M. indica                      | SD    | VYQGGKEL     | RDAPAPVGYH      |               |                 |
| C. papaya                      | SD    | IHYQGGKEL    | REAPAPVGYH      |               |                 |
| C. olitorius                   | SD    | IHFQGGKEL    | REAPAPVGYH      |               |                 |
| G. max                         | SD    | IHFQGGKEL    | REAPAPVGYH      |               |                 |
| V. unguiculata                 | SD    | IHFQGGKEL    | REAPAPVGYH      |               |                 |
| M. sativa                      | SD    | IHFQGGKEL    | RDAPAPVGYH      |               |                 |
| D. carota                      | SD    | IHFQGGKEL    | RDAPAPVGYH      |               |                 |
| S. lycopersicum                | SD    | IHYQGGKEL    | QEAAPVGYH       |               |                 |
| A. thaliana                    | SD    | IRNQGGKEL    | REAAAPVGYH      |               |                 |
| A. tauschii subsp. strangulata | SD    | VYYQGMQL     | KATPAPVGYH      |               |                 |
| T. aestivum                    | SD    | VYYQGMQL     | KATPAPVGYH      |               |                 |
| H. vulgare subsp. spontaneum   | SD    | VYYQGMQL     | KATPAPVGYH      |               |                 |
| P. hallii                      | SD    | VHYQGMEL     | KETPAPIEYH      |               |                 |
| S. officinarum                 | SD    | IHFQGMQL     | KETPAPVGYH      |               |                 |
| P. dactylifera                 | SD    | VHYQGMNL     | KEAPAPVGYH      |               |                 |
| E. guineensis                  | SD    | VHYQGMNL     | KQTPAPVGYH      |               |                 |
| P. equestris                   | SD    | VYQGM        | DLKQTPAPVGYH    |               |                 |
| M. alkaliphilum                | AN    | QLS          |                 |               |                 |
