# Supplementary material for: The identification of alternative oxidase in intermediate host snails of Schistosoma and its potential role in protecting Oncomelania hupensis against niclosamide-induced stress
Source: PubMed Central journal article supplement (PMC8935807; doi:10.1186/s13071-022-05227-5), 2022-03-21

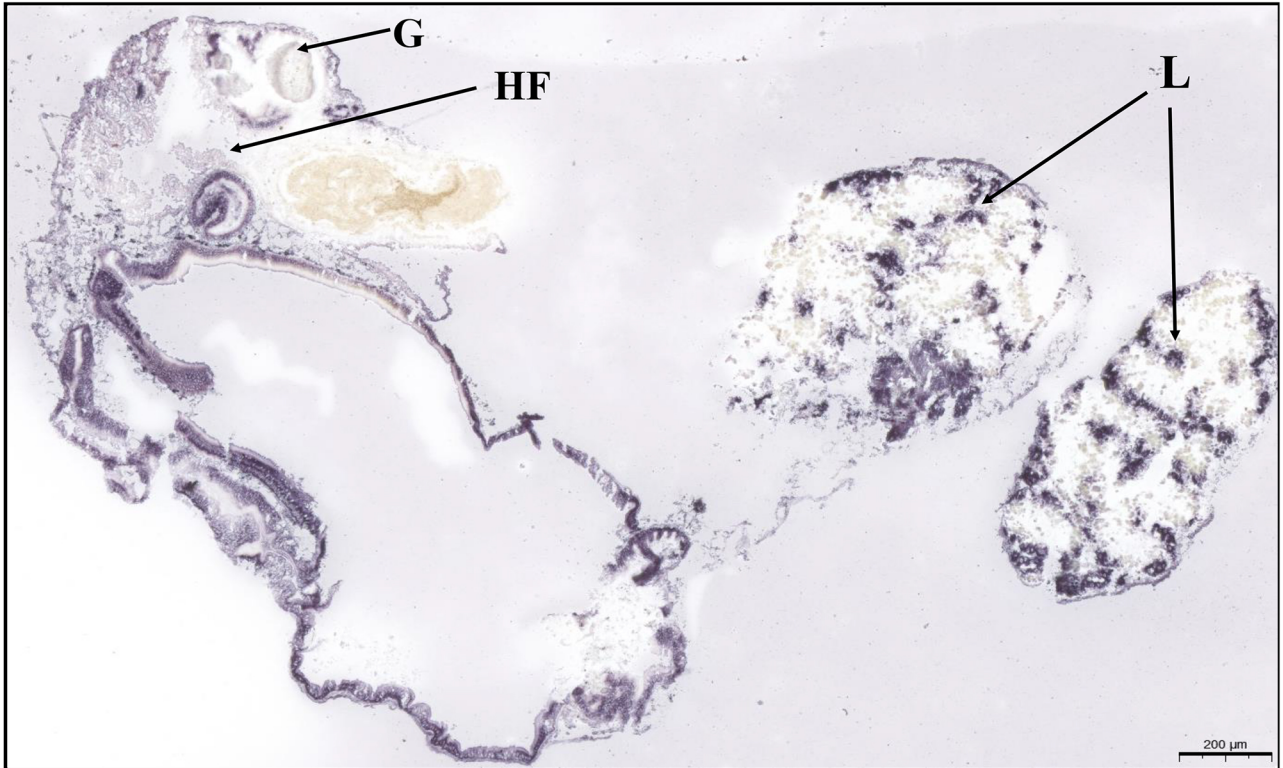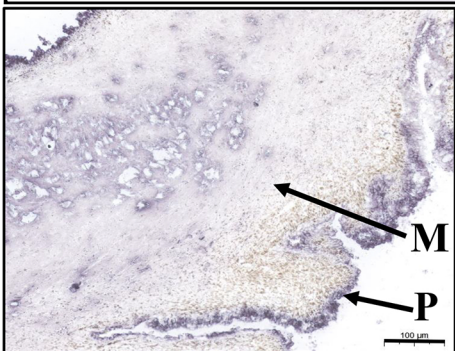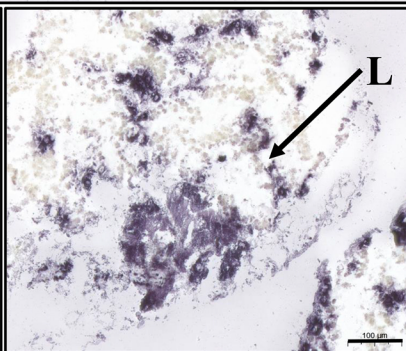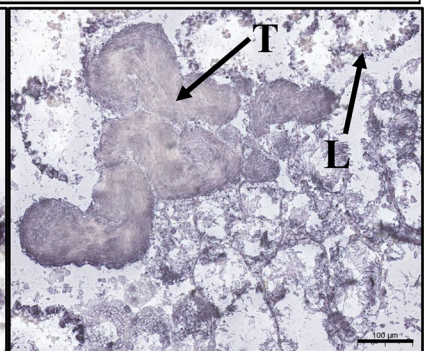

Supplement: 13071_2022_5227_MOESM8_ESM.pdf [file 13071_2022_5227_MOESM8_ESM.pdf]
